# Supplementary material for: Mental Health and Related Factors after the Great East Japan Earthquake and Tsunami
Source: PLoS One. 2014 Jul 24;9(7):e102497. doi: 10.1371/journal.pone.0102497 (PMC4109922; doi:10.1371/journal.pone.0102497)
Supplement: Appendix S1 — Age- and sex-specific numbers of participants, acceptance rates, and proportions of total population in the study area. (XLSX) [file pone.0102497.s001.xlsx]

## Sheet: Appendix S1
Appendix S1.
Age- and sex-specific numbers of participants, acceptance rates, and proportions of total population in the study area
	Total	Age groups (year)
		18-44	45-54	55-64	65-74	75 or older
Total participants
Number of total population in the study area as of Oct 1, 2011 (A)	42286	11408	6128	8667	7490	8593
Number of participants for health-checkup (B)	11124	1739	1250	2798	3416	1921
Number of study participants (C)	10198	1669	1177	2557	3083	1712
Proportion of total population C/A (%)	24.1167	14.6301	19.2069	29.5027	41.1615	19.9232
Acceptance rate C/B (%)	91.6757	95.9747	94.16	91.3867	90.2518	89.1202
Male participants
Number of total population in the study area as of Oct 1, 2011 (A)	19553	5844	3009	4139	3381	3180
Number of participants for health-checkup (B)	4151	601	421	965	1359	805
Number of study participants (C)	3978	588	409	919	1296	766
Proportion of total population C/A (%)	20.3447	10.0616	13.5926	22.2034	38.3319	24.0881
Acceptance rate C/B (%)	95.8323	97.8369	97.1496	95.2332	95.3642	95.1553
Female participants
Number of total population in the study area as of Oct 1, 2011 (A)	22733	5564	3119	4528	4109	5413
Number of participants for health-checkup (B)	6410	1102	786	1686	1850	986
Number of study participants (C)	6220	1081	768	1638	1787	946
Proportion of total population C/A (%)	27.3611	19.4285	24.6233	36.1749	43.4899	17.4764
Acceptance rate C/B (%)	97.0359	98.0944	97.7099	97.153	96.5946	95.9432
Data are expressed as numbers or percentages.
